# Supplementary material for: Quadrivalent mosaic HexaPro-bearing nanoparticle vaccine protects against infection of SARS-CoV-2 variants
Source: PubMed Central journal article supplement (PMC9106700; doi:10.1038/s41467-022-30222-w), 2022-05-13
Supplement: 41467_2022_30222_MOESM1_ESM.pdf [file 41467_2022_30222_MOESM1_ESM.pdf]

## 1 **Supplementary Information for**

2  
3 Yin-Feng Kang<sup>1#</sup>, Cong Sun<sup>1#</sup>, Jing Sun<sup>2#</sup>, Chu Xie<sup>1</sup>, Zhen Zhuang<sup>2</sup>, Hui-Qin Xu<sup>3</sup>,  
4 Zheng Liu<sup>3</sup>, Yi-Hao Liu<sup>4,5</sup>, Sui Peng<sup>4</sup>, Run-Yu Yuan<sup>6<sup>✉</sup></sup>, Jin-Cun Zhao<sup>2,7<sup>✉</sup></sup>, Mu-Sheng  
5 Zeng<sup>1,8<sup>✉</sup></sup>

6  
7 <sup>1</sup> State Key Laboratory of Oncology in South China, Collaborative Innovation Center  
8 for Cancer Medicine, Guangdong Key Laboratory of Nasopharyngeal Carcinoma  
9 Diagnosis and Therapy, Department of Experimental Research, Sun Yat-sen  
10 University Cancer Center (SYSUCC), Sun Yat-sen University, Guangzhou, 510060, P.  
11 R. China.

12 <sup>2</sup> State Key Laboratory of Respiratory Disease, National Clinical Research Center for  
13 Respiratory Disease, Guangzhou Institute of Respiratory Health, The First Affiliated  
14 Hospital of Guangzhou Medical University, Guangzhou, 510182, P. R. China.

15 <sup>3</sup> Cryo-electron Microscopy Center, Southern University of Science and Technology,  
16 Shenzhen, 518000, P. R. China.

17 <sup>4</sup> Institute of Precision Medicine, Clinical Trials Unit, The First Affiliated Hospital of  
18 Sun Yat-sen University, Guangzhou, 510080, P. R. China.

19 <sup>5</sup> Department of Endocrinology, The First Affiliated Hospital of Sun Yat-sen  
20 University, Guangzhou, 510080, P. R. China.

21 <sup>6</sup> Guangdong Provincial Institution of Public Health, Guangdong Provincial Center  
22 for Disease Control and Prevention, Guangzhou, 511430, P. R. China.

23 <sup>7</sup> Guangzhou Laboratory, Bio-island, Guangzhou, 510320, P. R. China.

24 <sup>8</sup> Guangdong-Hong Kong Joint Laboratory for RNA Medicine, Guangzhou, 510120, P.  
25 R. China.

26 <sup>#</sup> These authors contributed equally: Yin-Feng Kang, Cong Sun, Jing Sun.

27 <sup>✉</sup> email: [cecilia\\_yry@hotmail.com](mailto:cecilia_yry@hotmail.com); [zhaojincun@gird.cn](mailto:zhaojincun@gird.cn); [zengmsh@sysucc.org.cn](mailto:zengmsh@sysucc.org.cn)

28  
29

30

31 **Supplementary Figures**

32

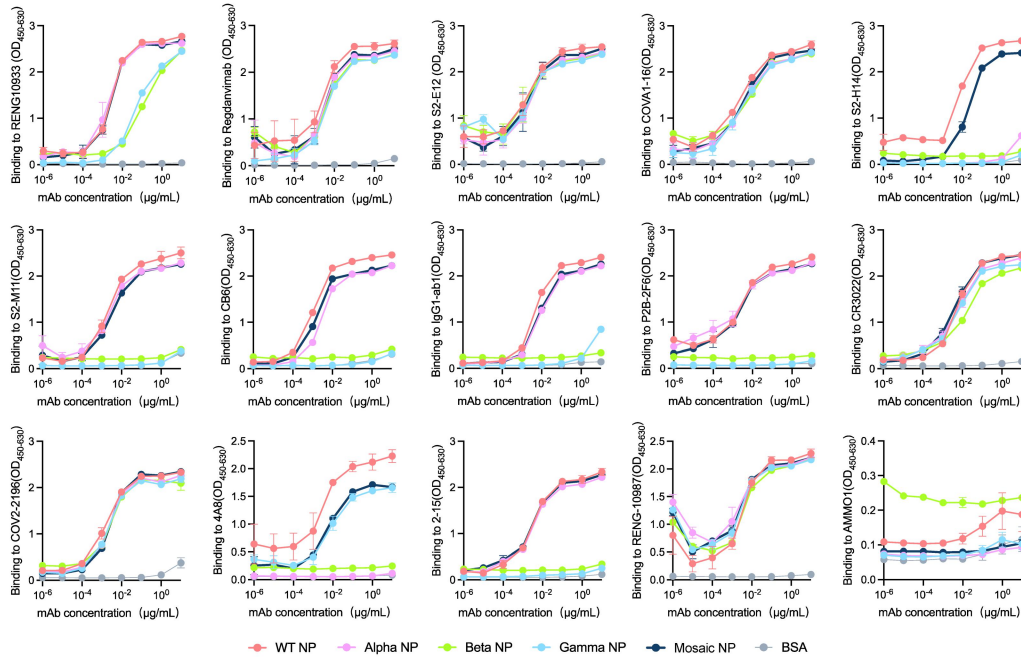

33

34 **Supplementary Fig. 1. Binding curves of SARS-CoV-2 Spike-specific**  
35 **neutralization antibodies against HexaPro-based nanoparticle immunogens**  
36 **measured by ELISA.** The data are presented as means  $\pm$  SD in duplicate from three  
37 independent experiments SARS-CoV spike-specific CR3022 antibody and EBV  
38 gH/gL-specific AMMO1 antibody were used as controls. Source data are provided as  
39 a Source Data file.

a

|            | T <sub>m1</sub> (° C) | T <sub>m2</sub> (° C) | T <sub>m3</sub> (° C) | T <sub>m4</sub> (° C) | T <sub>agg 266</sub> (° C) |
|------------|-----------------------|-----------------------|-----------------------|-----------------------|----------------------------|
| WT HexaPro | 33.9                  | 57.9                  | 70.1                  | -                     | -                          |
| WT NP      | 36.4                  | 64.6                  | 76.1                  | -                     | -                          |
| Alpha NP   | 34.7                  | 65.8                  | 74.5                  | -                     | -                          |
| Beta NP    | 33.9                  | 65.2                  | 74.9                  | -                     | -                          |
| Gamma NP   | 36.6                  | 46.4                  | 63.0                  | 74.5                  | 44.3                       |
| Mosaic NP  | 35.1                  | 44.8                  | 65.7                  | 76.8                  | 51.3                       |

b

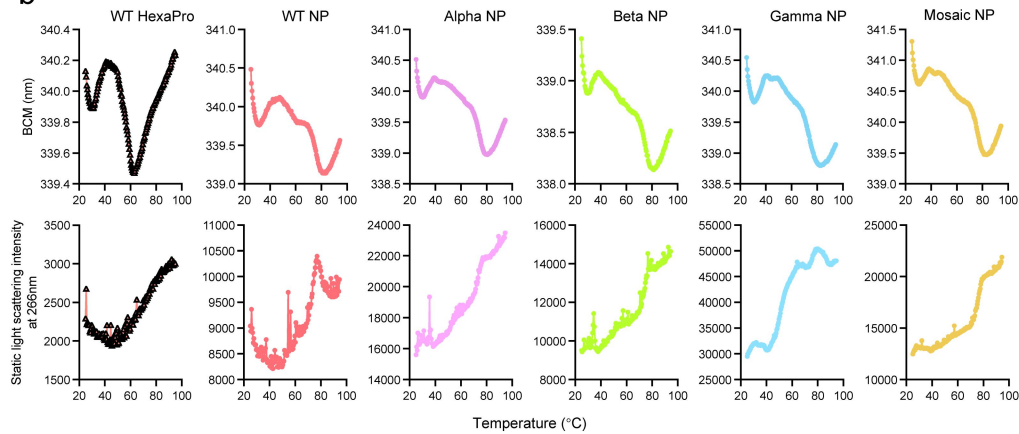

40

41

42 **Supplementary Fig. 2. Thermostability analysis of HexaPro-based immunogens.**

43 a. Thermostability parameter table of SARS-CoV-2 HexaPro or Hexapro-based  
 44 nanoparticles determined by DSF from three replicate experiments. T<sub>m</sub>: melting  
 45 temperature; T<sub>agg 266</sub>: aggregation temperature identified by the static light  
 46 scattering at 266nm.

47 b. Barycentric mean (BCM) of the intrinsic protein fluorescence from 300-430nm and  
 48 static light scattering intensity at 266nm of the HexaPro-based immunogens. The  
 49 curves presented the lined mean data of each temperature point from three replicate  
 50 experiments. Source data are provided as a Source Data file.

51

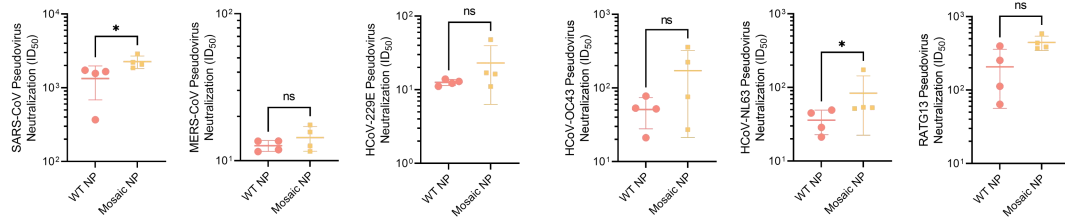

52

53 **Supplementary Fig. 3. Cross-neutralization of bat and human coronaviruses by**

54 **sera elicited by HexaPro-based nanoparticle immunogens.** Sera were collected

55 from two weeks after the second booster dose (n=4 cynomolgus macaques in each

56 group) and used to measure the cross-neutralization antibody titers using the

57 pseudoviruses assay. The data were expressed as means ±SD. Comparison between

58 the two groups were performed using a two-tailed Mann-Whitney U test. Mosaic NP

59 vs WT NP in SARS-CoV pseudovirus neutralization titers \*p = 0.0286, Mosaic NP vs

60 WT NP in HCoV-NL63 pseudovirus neutralization titers \*p = 0.0286. \*p < 0.05; ns,

61 no significant. Source data are provided as a Source Data file.

62

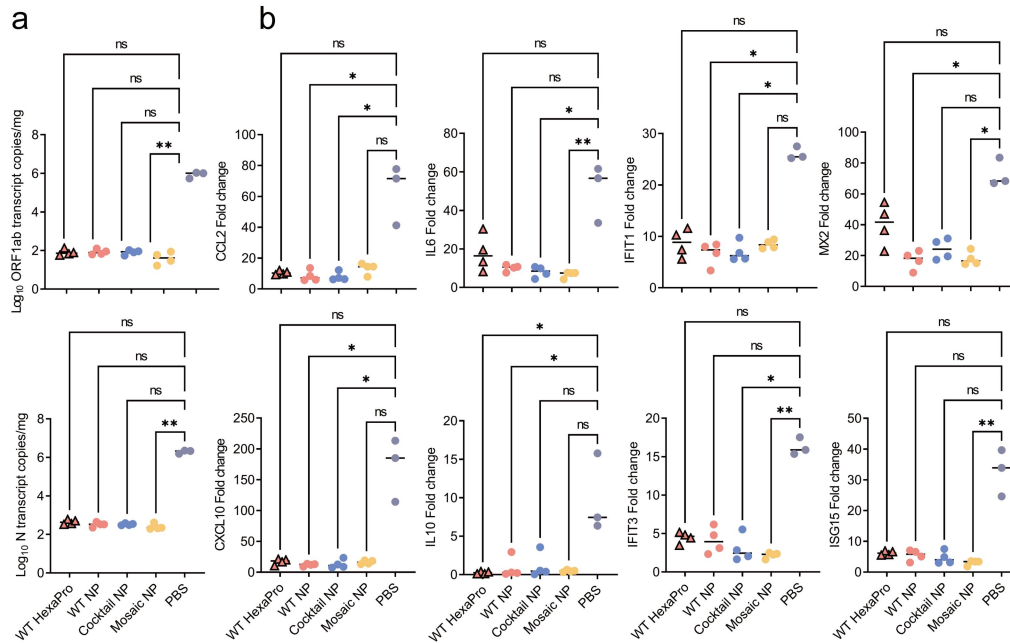

64

65 **Supplementary Fig. 4. Expression of immune-related cytokines and chemokines**  
 66 **and viral burden in infected lung tissues at 2 days post B.1.351 variant strain**

67 **infection.** a and b. The expression levels of viral burden (a) and cytokines and  
 68 chemokines (b) in the lungs at 2 days post infection was measured by qRT-PCR. The  
 69 data were expressed as means  $\pm$  SD. Comparisons between the two groups were  
 70 performed using a Kruskal-Wallis ANOVA with Dunn's correction. \* $p < 0.05$ , \*\* $p <$   
 71  $0.01$ ; ns, no significant. (a) Mosaic NP vs PBS in *ORF1ab* and *N* transcript copies,  
 72 \*\* $p = 0.0082$ . (b) WT NP and Cocktail NP vs PBS in *CCL2* fold change, \* $p = 0.0175$ ,  
 73 \* $p = 0.0210$ , respectively. Cocktail NP and Mosaic NP vs PBS in *IL6* fold change, \* $p$   
 74  $= 0.0250$ , \*\* $p = 0.0055$ , respectively. WT NP and Cocktail NP vs PBS in *IFIT1* fold  
 75 change, \* $p = 0.0354$ , \* $p = 0.0298$ , respectively. WT NP and Mosaic NP vs PBS in  
 76 *MX2* fold change, \* $p = 0.0175$ , \* $p = 0.0145$ , respectively. WT NP and Cocktail NP vs  
 77 PBS in *CXCL10* fold change, \* $p = 0.0250$ . WT HexaPro and WT NP vs PBS in *IL10*  
 78 fold change, \* $p = 0.0298$ , \* $p = 0.0419$ , respectively. Cocktail NP and Mosaic NP vs  
 79 PBS in *IFIT3* fold change, \* $p = 0.0419$ , \*\* $p = 0.0067$ , respectively. Mosaic NP vs  
 80 PBS in *ISG15* fold change, \*\* $p = 0.0082$ . Source data are provided as a Source Data

81 file.

82

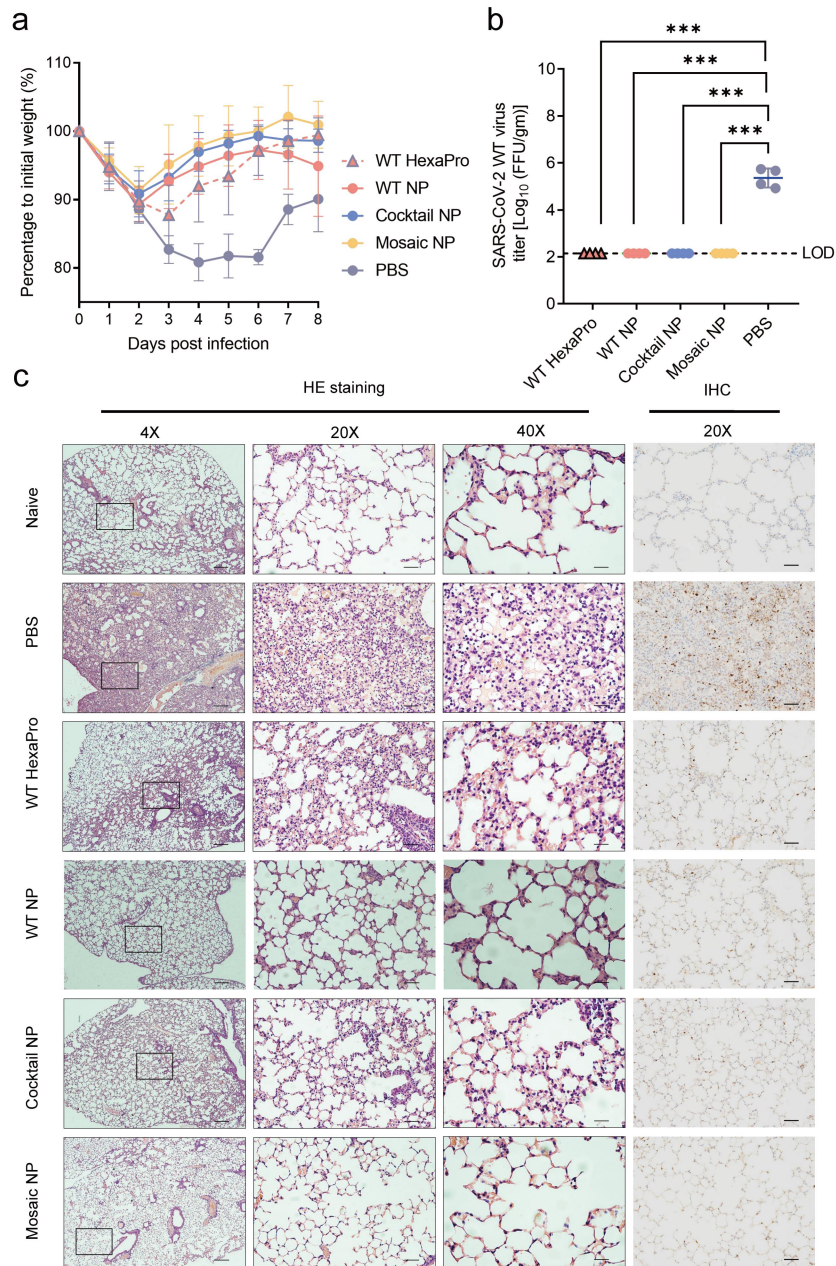

84

85

86 **Supplementary Fig. 5. Protective efficacy of HexaPro-bearing immunogens in**  
 87 **mice following challenge with authentic ancestral SARS-CoV-2 virus *in vivo*.** a-c,  
 88 six-week-old male BALB/c mice were subcutaneously immunized with an equivalent  
 89 amounts of HexaPro-based immunogens (equal to 5  $\mu$ g HexaPro) at weeks 0 and 3. At  
 90 3 weeks after the second vaccination, the mice were transduced intranasally with  
 91  $2.5 \times 10^8$  FFU of Ad5-hACE2, and after 5 days of transduction, the mice were  
 92 intranasally inoculated with  $2 \times 10^6$  PFU/ml of authentic ancestral SARS-CoV-2 virus.

93 Lung tissues were collected for virus titer quantification and  
94 clinicopathological analysis.

95 a. Body weight change of mice (n=3 in PBS-treated and WT NP-vaccinated mice, n=4  
96 mice in WT HexaPro, Cocktail NP and Mosaic NP-vaccinated group) after infection  
97 with ancestral SARS-CoV-2. The body weight of each mouse was recorded daily for 8  
98 days.

99 b. Virus titers of lung tissues from mice challenged with ancestral SARS-CoV-2 (n= 4  
100 mice in each group) at 2 days post challenge. LOD, limit of detection. Statistical  
101 significance was determined by two-tailed unpaired t test. WT HexaPro, WT NP,  
102 Cocktail NP and Mosaic NP vs PBS, \*\*\*p = 0.0001.

103 c. Immunohistological analysis of lung tissues from mice challenged with ancestral  
104 SARS-CoV-2 at 4 days post challenge (n=2 mice in each experimental group).  
105 Hematoxylin and eosin staining (HE, left) and immunohistochemistry (IHC, right)  
106 microscopic images are shown in the figure at magnification. Scale bar for H&E, 250  
107  $\mu\text{m}$  (left); 50  $\mu\text{m}$  (middle); 25  $\mu\text{m}$  (right), Scale bar for IHC, 50  $\mu\text{m}$ . In a and b, the  
108 data were expressed and plotted as means  $\pm$  SD. Source data are provided as a Source  
109 Data file.

110



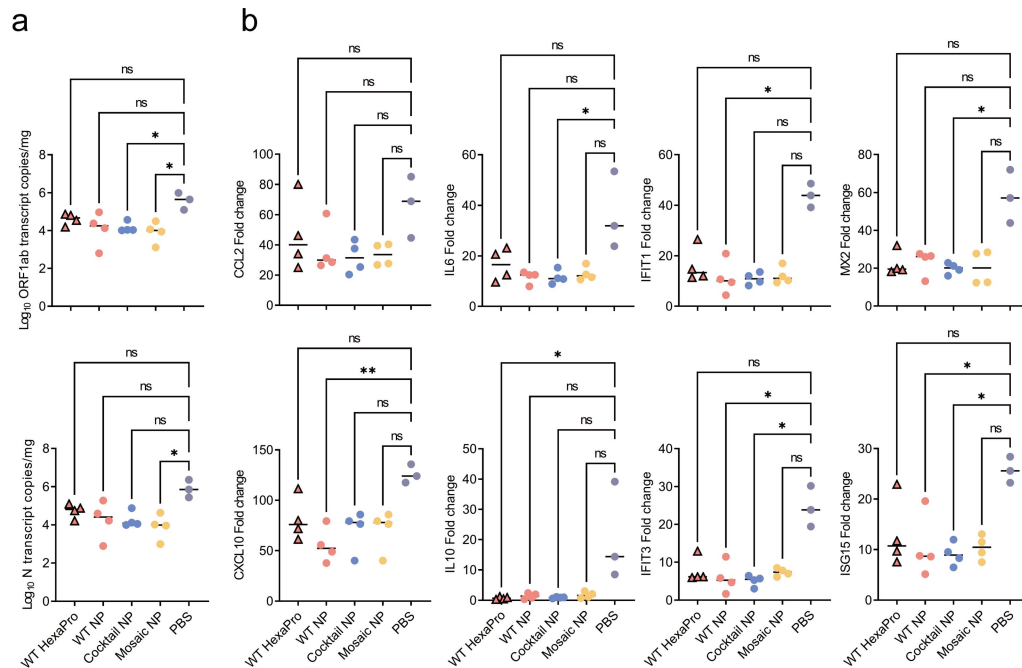

111

112

113 **Supplementary Fig. 6. Expression of immune-related cytokines and chemokines**

114 **and viral burden in infected lung tissues at 2 days post infection with the**

115 **ancestral SARS-CoV-2 strain. a and b. The expression levels of viral burden (a) and**

116 **cytokines and chemokines (b) in lungs at 2 days post infection were measured by**

117 **qRT-PCR assay. The data were expressed as means ± SD. Comparison between the**

118 **two groups was performed using a Kruskal-Wallis ANOVA with Dunn's correction.**

119 **\*p < 0.05; \*\*p < 0.01; ns, no significant. (a) Cocktail NP and Mosaic NP vs PBS in**

120 **ORF1ab transcript copies, \*p = 0.0419 and \*p = 0.0175, respectively, Mosaic NP vs**

121 **PBS in N transcript copies, \*p = 0.0120. (b) Cocktail NP vs PBS in IL6 fold change,**

122 **\*p = 0.0298. WT NP vs PBS in IFIT1 fold change, \*p = 0.0354. Cocktail NP vs PBS**

123 **in MX2 fold change, \*p = 0.0495. WT NP vs PBS in CXCL10 fold change, \*\*p =**

124 **0.0098. WT HexaPro vs PBS in IL10 fold change, \*\*p = 0.0210. WT NP and Cocktail**

125 **NP vs PBS in IFIT3 fold change, \*p = 0.0250, \*p = 0.0145, respectively. WT NP and**

126 **Cocktail NP vs PBS in ISG15 fold change, \*p = 0.0495. Source data are provided as a**

127 **Source Data file.**

128

129 **Supplementary Tables**

130 **Supplementary Table 1: Kinetic analysis of SARS-CoV-2 mAbs and ACE2**

131 **receptor to HexaPro and HexaPro-based nanoparticle immunogens of**

132 **SARS-CoV-2 prototype and variants.**

|                            |           | Antibody  |          |           |           |          |           |           |          |           | Receptor  |          |           |
|----------------------------|-----------|-----------|----------|-----------|-----------|----------|-----------|-----------|----------|-----------|-----------|----------|-----------|
|                            |           | REGN10933 |          |           | P2B-2F6   |          |           | 4A8       |          |           | ACE2      |          |           |
|                            |           | $K_D$     | $K_{on}$ | $K_{off}$ | $K_D$     | $K_{on}$ | $K_{off}$ | $K_D$     | $K_{on}$ | $K_{off}$ | $K_D$     | $K_{on}$ | $K_{off}$ |
| HexaPro                    | Wild type | 8.691E-11 | 2.472E05 | 2.149E-05 | 3.503E-11 | 3.419E05 | 1.198E-05 | 3.641E-11 | 3.608E05 | 1.314E-05 | 1.104E-08 | 9.378E04 | 1.035E-03 |
|                            | Alpha     | <1.0E-12  | 1.792E05 | 1.220E-07 | <1.0E-12  | 2.219E05 | 1.676E-07 | 3.336E-09 | 2.339E05 | 7.802E-04 | 3.307E-09 | 1.951E05 | 6.450E-04 |
|                            | Beta      | 6.492E-09 | 1.523E05 | 9.890E-04 | 5.715E-12 | 4.245E04 | 2.426E-07 | 1.583E-09 | 8.940E04 | 1.416E-04 | 4.607E-12 | 3.306E04 | 1.523E-07 |
|                            | Gamma     | 4.737E-09 | 2.754E05 | 1.304E-03 | 2.760E-09 | 1.199E05 | 3.309E-04 | <1.0E-12  | 2.972E05 | 2.041E-07 | 2.143E-09 | 1.178E05 | 2.524E-04 |
| HexaPro-based nanoparticle | Wild type | 1.231E-12 | 1.631E05 | 2.007E-07 | <1.0E-12  | 1.958E05 | 1.610E-07 | <1.0E-12  | 2.008E05 | <1.0E-07  | 4.498E-12 | 3.076E04 | 1.384E-07 |
|                            | Alpha     | 1.106E-12 | 1.594E05 | 1.762E-07 | 1.293E-12 | 1.878E05 | 2.429E-07 | <1.0E-12  | 1.596E05 | 1.528E-07 | 7.592E-12 | 3.198E04 | 2.428E-07 |
|                            | Beta      | 4.143E-12 | 3.399E04 | 1.408E-07 | 2.921E-12 | 3.760E04 | 1.098E-07 | 1.276E-12 | 4.892E04 | <1.0E-07  | 3.181E-12 | 6.566E04 | 2.089E-07 |
|                            | Gamma     | <1.0E-12  | 1.660E05 | <1.0E-07  | 1.493E-12 | 1.627E05 | 2.429E-07 | <1.0E-12  | 1.855E05 | 1.318E-07 | 1.707E-09 | 1.012E05 | 1.728E-04 |
|                            | Mosaic    | 1.187E-12 | 1.750E05 | 2.077E-07 | 1.351E-12 | 1.841E05 | 2.488E-07 | <1.0E-12  | 1.578E05 | <1.0E-07  | 3.529E-12 | 5.341E04 | 1.885E-07 |

133

134 For antibody or receptor binding, SARS-CoV-2 RBD-directed mAbs (REGN10933 and P2B-2F6),

135 NTD-directed mAb (4A8) and ACE2 receptor was immobilized onto the biosensors, and then

136 twofold diluted HexaPro or HexaPro-based nanoparticle immunogens injected into the wells.

137 Binding kinetics were analyzed with a 1:1 model in Octet Analysis Studio. Affinity constant

138 ( $K_D$ ), kinetic constants of associations ( $K_{on}$ ) and dissociations ( $K_{off}$ ) were summarized in this table.

139  $K_D$  is calculated from  $K_{off} / K_{on}$ .

140

141

142

143 **Supplementary Table 2: Quantitative RT-PCR primer used in this study.**

| <b>Gene</b> | <b>Primer</b>  | <b>Sequence</b>                  |
|-------------|----------------|----------------------------------|
| CCL2        | Forward primer | 5'-TTGACCCGTAAATCTGAAGCTAAT-3'   |
|             | Reverse primer | 5'-TCACAGTCCGAGTCACACTAGTTCAC-3' |
| IL6         | Forward primer | 5'-CACTTCACAAGTCGGAGGCT-3'       |
|             | Reverse primer | 5'-CTGCAAGTGCATCATCGTTGT-3'      |
| IFIT1       | Forward primer | 5'-CAAGGCAGGTTTCTGAGGAG-3'       |
|             | Reverse primer | 5'-GACCTGGTCACCATCAGCAT-3'       |
| MX2         | Forward primer | 5'-ACCAGAGTGCAAGTGAGGAGCT-3'     |
|             | Reverse primer | 5'-GTACTAGGGCAGTGATGTCCTG-3'     |
| CXCL10      | Forward primer | 5'-CCTGCCACGTGTTGAGAT-3'         |
|             | Reverse primer | 5'-TGATGGTCTTAGATTCCGGATTC-3'    |
| IL10        | Forward primer | 5'-CCCTGGGTGAGAAGCTGAAG-3'       |
|             | Reverse primer | 5'-CACTGCCTTGCTCTTATTTTCACA-3'   |
| IFIT3       | Forward primer | 5'-TTCCCAGCAGCACAGAAAC-3'        |
|             | Reverse primer | 5'-AAATTCCAGGTGAAATGGCA-3'       |
| ISG15       | Forward primer | 5'-TCCATGACGGTGTGAGAACT-3'       |
|             | Reverse primer | 5'-GACCCAGACTGGAAAGGGTA-3'       |

144

145
